# Supplementary material for: Influence of Asymmetry and Driving Forces on the Propulsion of Bubble-Propelled Catalytic Micromotors
Source: Micromachines (Basel). 2016 Dec 14;7(12):229. doi: 10.3390/mi7120229 (PMC6190221; doi:10.3390/mi7120229)
Supplement: Supplementary file 1 [file micromachines-07-00229-s001.zip]

Archive with 5 entries (5 files):
- micromachines-157973-Supple-to be published.pdf
- SV1.mov
- SV2.mov
- SV3.mov
- SV4.mov
